# Supplementary material for: Chromosomal rearrangements and protein globularity changes inMycobacterium tuberculosisisolates from cerebrospinal fluid
Source: PeerJ journal article supplement (doi:10.7717/peerj.2484), 2016-09-21
Supplement: Supplementary_Table_S6.pdf [file Supplementary_Table_S6.pdf]

| <b>Gene</b> | <b>Rv No.</b> | <b>Position</b>        | <b>Affected genes</b>                                                      |
|-------------|---------------|------------------------|----------------------------------------------------------------------------|
| embR        | Rv1267c       | 372                    | Cys changed to Gly                                                         |
| embR        | Rv1267c       | 376                    | Phe changed to Leu                                                         |
| lppD        | Rv1899c       | between 50 and<br>51   | Insertion -<br>Ala,Ser,Thr,Ala,Arg,Pro,Ala,Ala,Thr,Ala,Leu,Pro,Ala,Val,Ala |
| PE_PGRS10   | Rv0747        | 447                    | Ala changed to Asp                                                         |
| PE_PGRS10   | Rv0747        | 450                    | Ala changed to Asp                                                         |
| PE_PGRS10   | Rv0747        | 277                    | Asp changed to Asn                                                         |
| PE_PGRS10   | Rv0747        | 362                    | Ile changed to Leu                                                         |
| PE_PGRS10   | Rv0747        | 457                    | Leu changed to Phe                                                         |
| PE_PGRS10   | Rv0747        | 287                    | Ser changed to Ala                                                         |
| PE_PGRS19   | Rv1067c       | 271                    | Ala changed to Val                                                         |
| PE_PGRS21   | Rv1087        | between 711 and<br>712 | Insertion -<br>Ala,Gly,Gly,Gly,Gly,Gly,Ala,Gly,Gly,Ile,Gly,Gly,Asp,Gly,Gly |
| PE_PGRS49   | Rv3344c       | from 164 to 173        | Del - Ala,Thr,Asn,Pro,Gly,Ser,Gly,Ser,Arg,Gly                              |
| PPE58       | Rv3426        | 107                    | Thr changed to Ala                                                         |
| PPE58       | Rv3426        | from 217 to 218        | Del - Met,Val                                                              |
| Rv0278c     | Rv0278c       | 346                    | Ala changed to Ser                                                         |
| Rv0278c     | Rv0278c       | 842                    | Ala changed to Gly                                                         |
| Rv0278c     | Rv0278c       | 344                    | Met changed to Thr                                                         |
| Rv0278c     | Rv0278c       | 841                    | Ser changed to Tyr                                                         |
